# Supplementary material for: Comparative analysis of Kernel-based versus BFGS-ANN and deeplearning methods in monthly reference evaporation estimation
Source: Copernicus journal article supplement (doi:10.5194/hess-2020-224), 2020-07-22
Supplement: Supplementary file [file hess-2020-224-AC4-supplement.pdf]

## Reviewer 2

The study estimated monthly reference evapotranspiration (ET<sub>0</sub>) using four different machine learning techniques, including Gaussian process regression (GPR), support vector regression (SVR), long short-term memory (LSTM), and artificial neural network with the training function of Broyden-Fletcher-Goldfarb-Shanno quasi-Newton (BFGSANN). To obtain the best modeling performance, three different kernel functions for both GPR and SVM, and ten different combinations as inputs for all the models proposed were evaluated, respectively. LSTM method is currently an extensively used method in literature to address nonlinear regression problems in a wide range of applications. LSTM was compared with three conventional approaches (ANN, SVM and GPR), which provides a good and new insight to the existing studies. Regrettably, these models were not well investigated in terms of their generalization ability and computational efficiency. Moreover, the manuscript was not well-written, and its shortcomings can be found in each section. Substantial language improvements should be also made. Therefore, the manuscript needs major revisions before I can recommend it for publication.

Response:

Dear Referee,

Thank you for your valuable and kind comments. In this study, we will take your valuable comments into account as much as we can. We hope that your feedback will help us improve the quality of the study.

### Major Comments:

1). Sections Introduction and Methods were not well-written, as well as the organization and design of figures and tables.

Response: The paper has received in-depth language review from a native-speaker PhD in Applied Linguistics, in full command of academic English.

2). The dataset was split into two parts for training and testing. However, the results of all figures and tables were only shown in the testing period.

Response: In some similar artificial intelligence-based studies, when it comes to the results of the train and test period, in the majority, only the test period is given. If it is desirable to give the results of the train period for all methods and scenarios, it is necessary to add 4 new tables and 16 new figures. Since very successful results were obtained in our study, at the referee's recommendation, the values for the train period have been added to the table 4-5-6-7.

3). As we all know, machine learning is being widely used for addressing many issues, mainly including classification and regression. This study was conducted for regression and aimed at modeling and predicting monthly ET<sub>0</sub>. I don't know why the descriptions related to classification and classifier were frequently shown.

Response: In this study regression was, of course, what was mainly conducted. Use was made of regression and predictions in the Weka software and some other softwares included under the classification group. Classification and classifier as used in the article were to better explain the data and conditions used.

### Introduction

1). For the first paragraph, is it a popular science article? Or suggest deleting this paragraph.

Response: The paragraph as per the referee's recommendation has been deleted.

2). Lines 41-52: Some classical previous studies and reviews should be cited for support these descriptions. Besides, it is well known that many physical and empirical models as common methods have been widely used to estimate ET<sub>0</sub>. Suggest pointing out their advantages and disadvantages, and give some reasons why artificial intelligence (AI) techniques were adopted as alternative tools for this work.

Response: Some classical previous studies and reviews references have been added to (current) first three paragraphs. In the introduction, the advantages, disadvantages and the need for artificial intelligence in calculating ET0 have been emphasized more strongly.

3). As shown in Lines 53-119, so many previous studies (18) of ET0 estimation using different artificial intelligence models were reviewed monotonously. It is utterly pointless. Why did you carry out this study? It should be supported by more sound reasons. Suggest focusing on reviewing some extensively methods (e.g., ANN, SVM, GRNN) for ET0 prediction, and point out their advantages and disadvantages when estimating ET0 in terms of their performance and computational efficiency. For example, both ANN and SVM methods have received a great deal of attention in the last decade and have been extensively utilized in diverse fields. Nevertheless, these two approaches still have some shortcomings, which have been revealed by previous studies. In general, the ability of ANN method is limited by several disadvantages, such as slow learning speed, over-fitting and local minima. Additionally, it is also relatively difficult to determine some key parameters, such as training function and activation function. SVM also exists several drawbacks, such as high memory requirement and a large amount of computing time during learning process. In order to overcome the disadvantages of these two approaches, many new modeling techniques have been proposed in recent years. For instance, two state-of-the-art machine learning techniques, namely LSTM and GPR, are widely utilized in the hydrologic time series modeling and forecasting. To the best of our knowledge, however, there have been very few attempts to test the practicability and ability of these two advanced approaches (LSTM and GPR) for ET0 modeling and prediction.

Response: We agree with the referee's opinion on different artificial intelligence methods. Generally, ANN methods have disadvantages. However, despite all the disadvantages, it is still a preferred method in all branches of science and especially in Hydrology. In general, the capability of different ANN methods is discussed in terms of various disadvantages such as the large number of hidden layers, slow learning speed, overfitting and sticking to local minimums. At the same time, machine learning methods have some deficiencies such as the occasional difficulty of use, high memory requirements and large amounts of computation time in the learning process. In such a case, we see some recent developments in ANN methods and the use of deep learning techniques such as LSTM in water engineering. However, technical developments in computers and the emergence of relatively comfortable coding languages such as Python have enabled the overcoming of some deficiencies. In this study, we think that using different deep learning, machine learning and ANN methods in estimation of ET0 can shed light on future research and help determine more effective models in this field.

This opinion has been added to the last two paragraphs of the introduction of the article.

4). Regarding the last paragraph, the comparison of different kernel functions for SVM and GPR models, was designed as one goal of this study. Why did you attempt to compare these kernel functions? This aim should be supported by more sound reasons. To the best of my knowledge, many similar studies have been reported, which should reviewed before this paragraph.

Response: Due to the nature of the data used in the study, it is seen that different models result in different accuracy rates. Changing the kernel function in machine learning methods (SVR and GPR) affects the results positively or negatively. In this study, we tried different functions in order to determine the kernel function that is more compatible with the data we used and to increase the accuracy rate; subsequent to all of which the best function was determined.

5). For ANN model, training function plays an important role in its generalization performance. To my knowledge, a number of training functions (>10) can be used as alternative inner functions, such as conjugate gradient algorithms, gradient descent methods, quasi-Newton methods, Bayesian regulation backpropagation and one step secant backpropagation. The effects of these training functions on ANN have been reported frequently in in diverse fields. These related studies should be reviewed for offering more sound reasons for this paper. More importantly, in this study, why was BFGS selected as training function for ANN model? In order to better check the performance of these training functions, more training functions also can be adopted and compared with BFGS algorithm in this work.

Response: As stated by the referee, there are many training functions that increase the performance of the ANN model and it is also possible to make a study comparing different training functions. However, our aim in this study is not to compare different training functions in ANN modeling. In the literature, ANN modeling using the BFGS function in ETO prediction has been studied to a rather limited degree compared to other methods. In addition, the BFGS method is specified in the Weka document as a method that can yield quick results in cases where many parameters are involved. BFGS-ANN method has been included in our study for these reasons. Instead of adding new training functions to the study in which GPR, SVR, ANN and LSTM methods were compared, we think that it would be more appropriate to compare only different training functions in a new study.

### **Materials and methods**

1). Check the titles of “2 Material and method” and “3 Methods”.

Response: Titles have been checked and corrected.

2). For Table1, to better compare and evaluate the performance of the used models, the statistics of the data should be divided according to training and testing periods.

Response: The statistics of the data have been divided according to training and testing periods in Table 1. Comments on the training and test periods given in table 1 have been added to the text.

### **Methods**

1). For each method used in this paper, many irrelevant descriptions and inessential details should be omitted. More rigorous and precise description about the principle of the method used in this study should be given. Furthermore, some important and classical papers should be cited

Response: Less relevant definitions and details have been deleted. Three important and classical papers (Chauhan and Shrivastava 2008, Kumar et al. 2002 and Allen 1989) have been cited in the methods section.

2). For each method, please point out some special inner functions and parameters of the developed models. Because different functions and parameters have great effects on the generalization of those models. Taking ANN method for example, its generalization performance is generally dependent on many factors, mainly including topological structure of network and relevant parameters (e.g., learning rate, regularization factor and momentum factor) and functions (e.g., learning, activation and training algorithms). In this study, apart from training algorithm, the remaining features above-mentioned were determined by the trial and error method.

Response: In this study, during SVR and GPR modeling, three kernel functions were used including Polynomial, Pearson VII function-based universal, and radial basis function with the level of Gaussian Noise Parameters added to the diagonal of the covariance matrix and the random number of seed to be used (equal to 1.0); the most suitable kernel function in each scenario was determined by trial and error. BFGS-ANN method was also used for estimating ETO values. This method was implemented on the basis of radial basis function networks trained in a fully supervised manner using WEKA's Optimization class by minimizing squared error with the BFGS method. In this method, all attributes are normalized into the [0,1] scale.

The initial centers for the Gaussian radial basis functions were found using WEKA's SimpleKMeans. The initial sigma values were set to the maximum distance between any center and its nearest neighbour in the set of centers. Also in this method, one global sigma value was used for all units.

There were several parameters in the method. The ridge parameter was used to penalize the size of the weights in the output layer assumed to be 0.01, with the number of basis functions assumed to be two. To improve speed, an approximate version of the logistic function was used as the activation function in the output layer.

All this description has been added to the article.

3). Suggest adding some descriptions about the used toolbox, package or software for each method.

Response: In this study, BFGS-ANN, SVR and GPR methods in the Weka software and Python language for LSTM method were used during modelling. This has been brought out in the method section of the text.

## Results

1). The descriptions of all the tables and figures were so simple and monotonous.

Response: The titles and descriptions of the tables and figures have been checked and updated as much as possible.

2). As the title of this section is shown, more discussion should be given about this study.

Response: The interpretations were expanded by adding the results of the train period to the results of the existing test period.

## Conclusion

1). In this study,  $ET_0$  and its related meteorological data at a time scale of month were gathered from one weather station. Results showed that all the proposed models did a good job in simulating monthly  $ET_0$ . Nevertheless, these machine learning methods are likely to be questioned in that the intrinsic mechanisms of these well-trained black box models remain poorly described or understood. To a certain degree, this limitation decreases the reliability of these techniques.

Response: There are many references in the literature regarding the content and mathematical structure of the methods used in this study (Banda et al. 2018, Cobaner et al. 2017, Doorenbos and Pruitt 1977, Feng et al. 2017, Hargreaves and Samani 2013 etc.). Generally, these methods are used in all disciplines, although less relevant to mathematics and computer science. The aim here is to evaluate the performance of different techniques in  $ET_0$  estimation without going into the depths of mathematics. One of the major shortcomings of these methods is that it is difficult to understand the complexity and even to use the methods. As a matter of fact, the changes that can be made in the structural content of the methods are very time-consuming and difficult, but can be scientifically beneficial.

2). In the follow-up work, the performance of the GPR and LSTM models for the present study should be further evaluated at finer time scales, such as daily. Moreover, more weather stations or regions should be taken into consideration.

Response: Following the referee's suggestion, in terms of recommendations for follow-up studies, it was stated in the conclusion section that the performance of the GPR and LSTM models stands to be evaluated in a larger area on a daily time scale and with data obtained from more meteorological stations.

We are thankful to the Referee for her valuable comments towards the improvement of our paper.
