# Supplementary material for: Comparative analysis of Kernel-based versus BFGS-ANN and deeplearning methods in monthly reference evaporation estimation
Source: Copernicus journal article supplement (doi:10.5194/hess-2020-224), 2020-07-22
Supplement: Supplementary file [file hess-2020-224-AC5-supplement.pdf]

## Reviewer 1

Response:

Dear Referee,

Thank you for your valuable and kind comments. We agree with all your comments.

1- Share more numerical results in the Abstract. Mention the numerical results of the Model Evaluation in the Abstract.

Response: More numerical results have been given in the summary.

2- Table 1 description is not enough. Add the skewness coefficient, kurtosis coefficient and the coefficient of variation in Table 1.

Response: More comments have been added related Table 1. The skewness, kurtosis and variation coefficients have been added to Table 1.

3- Show the study area on the Map of Turkey.

Response: A map (Figure 1) showing the study area has been added.

4- The figures on figure 1 are not read. Please put in legible shape.

Response: The quality of Figure 1 (Figure 2) has been improved.

5- Add the coefficients of determination to the graphs in Figure 2.

Response: Coefficients of determination have been added to Figure 2 (Figure 3).

6- Substitute the results of the determination coefficient for the correlation coefficient, in table 4, 5, 6, and 7.

Response: The correlation coefficients in Table 4-7 have been replaced by the determination coefficient. Accordingly, necessary corrections have been made in the text.

7- Add the coefficients of determination to the graphs in Figure 4-6-8-10.

Response: Coefficients of determination have been added to Figure 4-6-8-10.

8- The resolution of all the figures in the study is low, the figures are not readable.

Response: The resolution of figures have been improved.

9- Add the skewness coefficient, kurtosis coefficient and the coefficient of variation in Table 8.

Response: The skewness, kurtosis and variation coefficients have been added to Table 8.

10- Important and relevant references have been ignored: Cobaner, M., Citakoglu, H., Haktanir, T., & Kisi, O. (2017). Modifying Hargreaves–Samani equation with meteorological variables for estimation of reference evapotranspiration in Turkey. *Hydrology Research*, 48(2), 480-497.

Response: Relevant reference has been examined and added to the article as a reference.

We are thankful to the Referee for her valuable comments towards the improvement of our paper.
